# Supplementary material for: Continuous lighting can improve yield and reduce energy costs while increasing or maintaining nutritional contents of microgreens
Source: Front Plant Sci. 2022 Sep 30;13:983222. doi: 10.3389/fpls.2022.983222 (PMC9564221; doi:10.3389/fpls.2022.983222)
Supplement: Supplementary file 1 [file Table_1.xlsx]

## Sheet: Sheet1
Electricity cost for Amaranth and Collard Greens					Electricity cost for green and purple Basil
	Hourly Ontario Electricity Price ($/MWh) obtained from IESO, 2022					Hourly Ontario Electricity Price ($/MWh) obtained from IESO, 2022
Hour	Replicate 1	Replicate 2	Replicate 3		Hour	Replicate 1	Replicate 2	Replicate 3
1	14.36	44.66	45.63		1	51.49	36.64	7.29
2	16.64	44.16	44.89		2	17.73	38.48	14.36
3	7.64	41.8	43.01		3	14.37	41.32	14.36
4	1.91	30.59	44.94		4	14.34	45.96	14.37
5	0	13.31	44.55		5	12.93	44.8	10.76
6	0.41	7.81	44.44		6	1.59	43.88	33.53
7	2.63	5.75	44.4		7	40.65	47.86	42.28
8	17.07	4.58	44.8		8	47.44	49.63	113.2
9	15.47	11.57	36.18		9	48.78	48.03	63.17
10	37.41	33.96	42.81		10	48.66	47.81	42.26
11	37.46	29.24	44.78		11	49.17	47.81	44.51
12	21.01	23.33	44.01		12	52.93	44.96	14.34
13	36.24	16.5	41.8		13	50.99	44.67	8.1
14	28.98	14.34	31.65		14	48.29	43.43	14.35
15	35.73	26.92	44.03		15	45.7	40.32	14.33
16	34	45.5	46.6		16	45.53	39.98	39.06
17	36.23	38.97	48		17	48.63	34.44	43.04
18	35.55	37	48.22		18	48.66	40.66	44.34
19	27.47	52.33	47.94		19	48.88	43.94	45.94
20	36.23	38.85	47.88		20	48.31	43.52	45.93
21	35.4	11.64	45.46		21	45.35	44.27	45.54
22	22.6	9.45	44.97		22	45.73	45.05	46.24
23	10.06	4.11	44.86		23	29.51	39.21	45.58
24	2.36	0	47.46		24	22.92	24.69	25.84
1	0	0	51.08		1	25.93	42.82	15.29
2	0	0	41.82		2	20.87	41.34	1.61
3	0	0	44.42		3	14.37	42.15	0
4	0	0	34.59		4	31.91	43.54	7.1
5	0	0	44.63		5	29.81	43.06	7.44
6	0	0	45.03		6	43.97	42.34	8.56
7	5.27	0	47.78		7	45.21	42.49	25.52
8	11.47	0	47.9		8	53.16	45.38	33.86
9	13.31	0	47.81		9	55.81	45.63	18.68
10	26.96	0	46.83		10	50.77	43.96	26.55
11	35.9	0	46.12		11	48.82	43.68	41.08
12	34.69	0	44.74		12	46.9	43.59	42.85
13	15.5	0	43.49		13	45.36	42.47	14.38
14	18.51	0	36.57		14	43.36	41.5	45.52
15	32.9	0	41.11		15	43.22	31.76	35.43
16	35.52	0	40.34		16	41.94	42.67	28.52
17	37.14	7.07	44.8		17	45.36	41.06	38.95
18	39.85	43.95	44.63		18	45.93	43.41	29.24
19	41.46	22	45.39		19	46.9	42.7	46.33
20	41.05	34.33	44.91		20	46.4	43.26	47.6
21	40.99	36.04	44.62		21	50.56	46.72	46.4
22	40.93	45.78	44.85		22	48.51	47.37	41.89
23	40.22	66.45	45.62		23	45.5	49.61	27
24	37.61	68.11	42.82		24	15.42	44.84	31.84
1	41.83	51.49	41.37		1	36.64	43.14	32.64
2	39.23	17.73	42		2	38.48	42.34	14.38
3	37.96	14.37	43.7		3	41.32	39.93	14.35
4	45.76	14.34	43.89		4	45.96	38.17	14.36
5	37.59	12.93	40.63		5	44.8	37.71	12.93
6	37.5	1.59	41.47		6	43.88	43.83	27.75
7	41.73	40.65	42.72		7	47.86	45.12	44.53
8	45.66	47.44	46.38		8	49.63	50.19	49.05
9	42.93	48.78	45.11		9	48.03	52.55	48.38
10	42.53	48.66	43.92		10	47.81	48.04	48.89
11	44.3	49.17	43.71		11	47.81	47.93	49.17
12	47.64	52.93	44.59		12	44.96	52.99	49.8
13	42.34	50.99	46.57		13	44.67	54.13	48.24
14	41.75	48.29	46.9		14	43.43	49.68	46.67
15	41.47	45.7	46.55		15	40.32	48.63	48.77
16	41.36	45.53	44.03		16	39.98	47.86	52.08
17	41.8	48.63	44.06		17	34.44	46.99	47.49
18	68.23	48.66	46.58		18	40.66	47.3	46.68
19	55.98	48.88	46.82		19	43.94	48.39	49.63
20	51.44	48.31	46.37		20	43.52	46.34	47.74
21	43.38	45.35	43.19		21	44.27	44.32	45.33
22	53.39	45.73	41.25		22	45.05	44.66	37.22
23	42.46	29.51	42.36		23	39.21	41.3	30.75
24	41.57	22.92	44.48		24	24.69	18.16	23.58
1	42.4	25.93	43.11		1	42.82	6.96	14.37
2	43.78	20.87	43.23		2	41.34	12.79	20.33
3	45.78	14.37	41.41		3	42.15	14.32	38.44
4	58.49	31.91	42.32		4	43.54	14.33	39.23
5	53.31	29.81	39.64		5	43.06	14.36	40.65
6	50.66	43.97	42.51		6	42.34	13.6	49.18
7	50.98	45.21	45.1		7	42.49	13.64	46.99
8	47.38	53.16	49.96		8	45.38	24.32	49.82
9	53.17	55.81	44.32		9	45.63	41.34	40.42
10	76.81	50.77	44.29		10	43.96	38.82	48.4
11	73.69	48.82	43.24		11	43.68	41.86	40.08
12	66.45	46.9	43.03		12	43.59	44.43	19.42
13	43.41	45.36	42.81		13	42.47	36.21	9.5
14	41.89	43.36	42.9		14	41.5	14.36	11.7
15	40.91	43.22	42.83		15	31.76	14.35	14.35
16	42.33	41.94	42.59		16	42.67	29.26	36
17	49.78	45.36	42.5		17	41.06	30.13	14.35
18	56.61	45.93	42.16		18	43.41	45.09	14.37
19	62.29	46.9	41.33		19	42.7	45.86	14.35
20	66.42	46.4	30.02		20	43.26	45.35	14.35
21	66.87	50.56	22.12		21	46.72	44.94	14.36
22	68.27	48.51	16.8		22	47.37	45.54	16.72
23	44.73	45.5	13.98		23	49.61	47.75	19.93
24	50.37	15.42	13.15		24	44.84	47.22	13.67
1	41.76	36.64	14.35		1	43.14	45.63	14.35
2	43	38.48	19.91		2	42.34	44.89	14.36
3	45.38	41.32	30.91		3	39.93	43.01	14.36
4	43.36	45.96	37.06		4	38.17	44.94	12.44
5	43.16	44.8	22.34		5	37.71	44.55	14.36
6	43.2	43.88	16.19		6	43.83	44.44	16.69
7	47.22	47.86	33.4		7	45.12	44.4	14.37
8	156.17	49.63	43.94		8	50.19	44.8	14.36
9	111.64	48.03	43.19		9	52.55	36.18	16.72
10	118.87	47.81	40.27		10	48.04	42.81	32.33
11	48.41	47.81	43.42		11	47.93	44.78	16.74
12	46.12	44.96	44.57		12	52.99	44.01	19.08
13	42.61	44.67	43.37		13	54.13	41.8	14.34
14	37.17	43.43	35.06		14	49.68	31.65	13.73
15	37.37	40.32	35.71		15	48.63	44.03	14.34
16	37.5	39.98	36.45		16	47.86	46.6	27.4
17	45.05	34.44	43.33		17	46.99	48	49.17
18	75.06	40.66	43.89		18	47.3	48.22	49.51
19	69.63	43.94	44.83		19	48.39	47.94	50.21
20	54.08	43.52	41.9		20	46.34	47.88	49.83
21	43.32	44.27	31.46		21	44.32	45.46	65.15
22	41	45.05	30.05		22	44.66	44.97	49.92
23	38.31	39.21	30.03		23	41.3	44.86	43.97
24	34.08	24.69	34.64		24	18.16	47.46	43.43
1	6.52	42.82	42.5		1	6.96	51.08	44.36
2	0	41.34	30.53		2	12.79	41.82	48.39
3	0	42.15	16.12		3	14.32	44.42	48.5
4	0	43.54	8.09		4	14.33	34.59	47.91
5	0.41	43.06	15.91		5	14.36	44.63	48.98
6	7.84	42.34	27.08		6	13.6	45.03	54.76
7	35.12	42.49	41.71		7	13.64	47.78	57.99
8	42.9	45.38	45.61		8	24.32	47.9	53.37
9	43.23	45.63	47.08		9	41.34	47.81	51.89
10	40.63	43.96	46.58		10	38.82	46.83	51.09
11	39.78	43.68	45.61		11	41.86	46.12	49.04
12	14.36	43.59	45.1		12	44.43	44.74	49.04
13	33.98	42.47	45.01		13	36.21	43.49	44.56
14	33.94	41.5	44.58		14	14.36	36.57	43.72
15	39.63	31.76	44.73		15	14.35	41.11	46.1
16	34.54	42.67	38.52		16	29.26	40.34	48.62
17	36.7	41.06	36.97		17	30.13	44.8	52.71
18	37.5	43.41	12.97		18	45.09	44.63	55.08
19	29.59	42.7	9.8		19	45.86	45.39	70.69
20	32.35	43.26	3.89		20	45.35	44.91	73.99
21	37.42	46.72	10.85		21	44.94	44.62	56.16
22	29.72	47.37	25.72		22	45.54	44.85	54.09
23	20.34	49.61	22.35		23	47.75	45.62	49.74
24	8.21	44.84	13.12		24	47.22	42.82	47.94
1	10.77	43.14	11.87		1	45.63	41.37	48.82
2	14.35	42.34	8.11		2	44.89	42	46.56
3	18.57	39.93	13.54		3	43.01	43.7	47.34
4	36.27	38.17	5.77		4	44.94	43.89	44.17
5	41.27	37.71	7.91		5	44.55	40.63	45.53
6	37.23	43.83	24.49		6	44.44	41.47	64.67
7	43.05	45.12	41.91		7	44.4	42.72	66.09
8	35.63	50.19	34.55		8	44.8	46.38	55.66
9	39.16	52.55	29.67		9	36.18	45.11	52.74
10	41.9	48.04	27.19		10	42.81	43.92	50.03
11	41.17	47.93	47.16		11	44.78	43.71	52.03
12	45.73	52.99	49.5		12	44.01	44.59	48.63
13	70.17	54.13	46.19		13	41.8	46.57	48.86
14	72.15	49.68	36.01		14	31.65	46.9	48.64
15	59.51	48.63	38.29		15	44.03	46.55	40.56
16	46.78	47.86	47.95		16	46.6	44.03	43.62
17	53.17	46.99	26.63		17	48	44.06	48.06
18	138.86	47.3	14.34		18	48.22	46.58	48.03
19	48.91	48.39	14.31		19	47.94	46.82	55.74
20	102.72	46.34	33		20	47.88	46.37	60.44
21	49.91	44.32	27.45		21	45.46	43.19	50.75
22	46.51	44.66	9.52		22	44.97	41.25	50.22
23	42	41.3	8.22		23	44.86	42.36	48.8
24	45.71	18.16	11.74		24	47.46	44.48	41.66
1	52.05	6.96	11.85		1	51.08	43.11	45.25
2	47.41	12.79	14.37		2	41.82	43.23	35.48
3	43.69	14.32	27.1		3	44.42	41.41	14.35
4	40.32	14.33	35.01		4	34.59	42.32	16.84
5	15.7	14.36	13.61		5	44.63	39.64	39.2
6	13.6	13.6	21.12		6	45.03	42.51	47.39
7	39.45	13.64	28.18		7	47.78	45.1	58.98
8	46.41	24.32	21.2		8	47.9	49.96	58.86
9	46.87	41.34	47.9		9	47.81	44.32	48.57
10	47.17	38.82	35.93		10	46.83	44.29	53.82
11	46.87	41.86	28.27		11	46.12	43.24	48.57
12	61.94	44.43	17.74		12	44.74	43.03	47.94
13	49.5	36.21	19.82		13	43.49	42.81	47.39
14	47.62	14.36	7.61		14	36.57	42.9	70.86
15	43.79	14.35	9		15	41.11	42.83	211.52
16	43.14	29.26	13.29		16	40.34	42.59	67.66
17	43.83	30.13	32.28		17	44.8	42.5	49.09
18	44.39	45.09	37.89		18	44.63	42.16	47.42
19	46.8	45.86	44.87		19	45.39	41.33	44.8
20	46.58	45.35	45		20	44.91	30.02	34.81
21	45.64	44.94	44.27		21	44.62	22.12	48.08
22	45.18	45.54	38.8		22	44.85	16.8	57.35
23	43.85	47.75	37.73		23	45.62	13.98	169.3
24	44	47.22	33.11		24	42.82	13.15	36.45
1	36.65	45.63	14.36		1	41.37	14.35	29.36
2	40.85	44.89	39.42		2	42	19.91	2.88
3	41.23	43.01	41.57		3	43.7	30.91	0
4	41.26	44.94	43.17		4	43.89	37.06	0
5	41.22	44.55	40.66		5	40.63	22.34	7.55
6	38.61	44.44	45.09		6	41.47	16.19	13.57
7	41.02	44.4	46.22		7	42.72	33.4	42.67
8	41.81	44.8	45.2		8	46.38	43.94	14.37
9	41.35	36.18	44.53		9	45.11	43.19	8.95
10	41.32	42.81	44.42		10	43.92	40.27	7.68
11	41.04	44.78	43.58		11	43.71	43.42	14.35
12	43.02	44.01	42.29		12	44.59	44.57	14.34
13	40.84	41.8	43.54		13	46.57	43.37	18.58
14	40.82	31.65	43.12		14	46.9	35.06	25
15	31.31	44.03	37.68		15	46.55	35.71	11.6
16	16.01	46.6	38.65		16	44.03	36.45	11.55
17	40.37	48	44.06		17	44.06	43.33	10.36
18	53.02	48.22	43.96		18	46.58	43.89	13.73
19	47.81	47.94	44.23		19	46.82	44.83	12.24
20	49.6	47.88	43.91		20	46.37	41.9	13.25
21	47.58	45.46	43.95		21	43.19	31.46	49.65
22	42.85	44.97	42.38		22	41.25	30.05	35.84
23	42.75	44.86	43.46		23	42.36	30.03	15.87
24	41.61	47.46	46.21		24	44.48	34.64	23.37
					1	43.11	42.5	27.45
					2	43.23	30.53	37.42
					3	41.41	16.12	17.45
					4	42.32	8.09	13.41
					5	39.64	15.91	28.54
					6	42.51	27.08	48.85
					7	45.1	41.71	51.33
					8	49.96	45.61	59.61
					9	44.32	47.08	52.02
					10	44.29	46.58	38.34
					11	43.24	45.61	34.08
					12	43.03	45.1	27.68
					13	42.81	45.01	13.22
					14	42.9	44.58	12.73
					15	42.83	44.73	10.28
					16	42.59	38.52	14.92
					17	42.5	36.97	37.1
					18	42.16	12.97	38
					19	41.33	9.8	59.92
					20	30.02	3.89	80.85
					21	22.12	10.85	34.07
					22	16.8	25.72	40.61
					23	13.98	22.35	41.68
					24	13.15	13.12	47.56
					1	14.35	11.87	54.61
					2	19.91	8.11	51.04
					3	30.91	13.54	47.76
					4	37.06	5.77	52.95
					5	22.34	7.91	52.03
					6	16.19	24.49	54.16
					7	33.4	41.91	52.66
					8	43.94	34.55	47.94
					9	43.19	29.67	42.74
					10	40.27	27.19	49.18
					11	43.42	47.16	49.95
					12	44.57	49.5	49.57
					13	43.37	46.19	51.32
					14	35.06	36.01	51.68
					15	35.71	38.29	51.36
					16	36.45	47.95	44.22
					17	43.33	26.63	50.33
					18	43.89	14.34	55.53
					19	44.83	14.31	53.79
					20	41.9	33	54.15
					21	31.46	27.45	53.58
					22	30.05	9.52	51.17
					23	30.03	8.22	46.46
					24	34.64	11.74	49.72
					1	42.5	11.85	28.33
					2	30.53	14.37	14.4
					3	16.12	27.1	44.17
					4	8.09	35.01	45.76
					5	15.91	13.61	48.37
					6	27.08	21.12	38.89
					7	41.71	28.18	30.22
					8	45.61	21.2	48.26
					9	47.08	47.9	51.99
					10	46.58	35.93	50.74
					11	45.61	28.27	51.35
					12	45.1	17.74	54.14
					13	45.01	19.82	54.73
					14	44.58	7.61	57.4
					15	44.73	9	55.05
					16	38.52	13.29	58.53
					17	36.97	32.28	63.94
					18	12.97	37.89	62.01
					19	9.8	44.87	75.99
					20	3.89	45	73.74
					21	10.85	44.27	63.24
					22	25.72	38.8	61.23
					23	22.35	37.73	59.17
					24	13.12	33.11	50.25
					1	11.87	14.36	51.81
					2	8.11	39.42	51.55
					3	13.54	41.57	51.57
					4	5.77	43.17	53.55
					5	7.91	40.66	53.91
					6	24.49	45.09	82.53
					7	41.91	46.22	71.21
					8	34.55	45.2	59.66
					9	29.67	44.53	61.55
					10	27.19	44.42	119.18
					11	47.16	43.58	94.24
					12	49.5	42.29	55.5
					13	46.19	43.54	70.64
					14	36.01	43.12	52.13
					15	38.29	37.68	47.94
					16	47.95	38.65	46.64
					17	26.63	44.06	59.56
					18	14.34	43.96	70.32
					19	14.31	44.23	82.48
					20	33	43.91	77.8
					21	27.45	43.95	59.96
					22	9.52	42.38	50.16
					23	8.22	43.46	49.1
					24	11.74	46.21	47.52
					1	11.85	48.41	40.49
					2	14.37	42.82	19.75
					3	27.1	46.24	26.43
					4	35.01	14.42	46.67
					5	13.61	28.56	40.39
					6	21.12	39.82	66.92
					7	28.18	44.33	123.8
					8	21.2	42.56	107.88
					9	47.9	37.24	107.15
					10	35.93	42.75	73.06
					11	28.27	42.28	66.68
					12	17.74	45.55	88.01
					13	19.82	52.64	58.43
					14	7.61	47.38	59.28
					15	9	43.73	53.15
					16	13.29	39.46	57.79
					17	32.28	39.11	55.28
					18	37.89	42.5	54.89
					19	44.87	380.39	54.76
					20	45	42.44	54.58
					21	44.27	40.74	56.75
					22	38.8	9.93	17.16
					23	37.73	4.88	8.07
					24	33.11	3.26	10.86
					1	14.36	7.29	13.7
					2	39.42	14.36	13.73
					3	41.57	14.36	14.31
					4	43.17	14.37	17.54
					5	40.66	10.76	25.68
					6	45.09	33.53	36.7
					7	46.22	42.28	38.07
					8	45.2	113.2	51.93
					9	44.53	63.17	46.52
					10	44.42	42.26	29.42
					11	43.58	44.51	11.06
					12	42.29	14.34	13.73
					13	43.54	8.1	25.26
					14	43.12	14.35	88.37
					15	37.68	14.33	39.85
					16	38.65	39.06	30.85
					17	44.06	43.04	41.8
					18	43.96	44.34	42.08
					19	44.23	45.94	55
					20	43.91	45.93	55.64
					21	43.95	45.54	100.98
					22	42.38	46.24	99.33
					23	43.46	45.58	44.6
					24	46.21	25.84	37.29
